# Supplementary material for: Four anionic Ln-MOFs for remarkable separation of C2H2–CH4/CO2–CH4 and highly sensitive sensing of nitrobenzene
Source: Royal Society of Chemistry journal article supplement (doi:10.1039/d1ce00235j), 2021-01-01
Supplement: d1ce00235j1.pdf [file d1ce00235j1.pdf]

# Four anionic Ln-MOF for remarkable separations for C<sub>2</sub>H<sub>2</sub>-CH<sub>4</sub> / CO<sub>2</sub>-CH<sub>4</sub> and highly sensitive sensing of nitrobenzene

Cai-Hong Zhan#, Dan-Ping Huang#, Yu Wang, Wei-Tao Mao, Xiao-Juan Wang\*,  
Zhan-Guo Jiang\*, and Yun-Long Feng

# These authors contributed equally to this work; E-mail: wangxj@zjnu.cn,  
jzg@zjnu.cn

## Table of Contents

|                                                                                                                 |          |
|-----------------------------------------------------------------------------------------------------------------|----------|
| <b>S1 Materials</b> .....                                                                                       | <b>1</b> |
| <b>S2 General Experimental Section</b> .....                                                                    | <b>1</b> |
| <b>Powder X-ray Diffraction (PXRD)</b> .....                                                                    | <b>1</b> |
| <b>Thermogravimetric Analyses (TGA)</b> .....                                                                   | <b>2</b> |
| <b>Single-crystal X-ray diffraction (SCXRD)</b> .....                                                           | <b>2</b> |
| <b>S3. Synthesis and Experimental Section</b> .....                                                             | <b>2</b> |
| <b>Synthesis of [Gd<sub>3</sub>L<sub>3</sub>(HCOO)]·Me<sub>2</sub>NH<sub>2</sub><sup>+</sup>·7DMF (1)</b> ..... | <b>2</b> |
| <b>Synthesis of [Tb<sub>3</sub>L<sub>3</sub>(HCOO)]·Me<sub>2</sub>NH<sub>2</sub><sup>+</sup>·7DMF (2)</b> ..... | <b>3</b> |
| <b>Synthesis of [Ho<sub>3</sub>L<sub>3</sub>(HCOO)]·Me<sub>2</sub>NH<sub>2</sub><sup>+</sup>·7DMF (3)</b> ..... | <b>3</b> |
| <b>Synthesis of [Dy<sub>3</sub>L<sub>3</sub>(HCOO)]·Me<sub>2</sub>NH<sub>2</sub><sup>+</sup>·7DMF (4)</b> ..... | <b>3</b> |
| <b>S4. Crystal data and structure refinement</b> .....                                                          | <b>3</b> |

|                                                  |          |
|--------------------------------------------------|----------|
| <b>S5 Powder X-ray diffraction (PXRD)</b> .....  | <b>4</b> |
| <b>S6 Thermogravimetric analyses (TGA)</b> ..... | <b>6</b> |
| <b>S7 Reference</b> .....                        | <b>6</b> |
| <b>S8 Tables for bond lengths</b> .....          | <b>7</b> |

## **S1 Materials**

All starting materials and reagents were purchased from commercial suppliers and used without further purification. 3-(3,5-dicarboxylphenyl)-5-(4-carboxylphenyl)-1,2,4-triazole; HO(NO<sub>3</sub>)<sub>3</sub>·6H<sub>2</sub>O; Dy(NO<sub>3</sub>)<sub>3</sub>·6H<sub>2</sub>O; Tb(NO<sub>3</sub>)<sub>3</sub>·6H<sub>2</sub>O; Gd(NO<sub>3</sub>)<sub>3</sub>·6H<sub>2</sub>O; DMF; H<sub>2</sub>O; HNO<sub>3</sub>.

## **S2 General Experimental Section**

### **Powder X-ray Diffraction (PXRD)**

Powder XRD patterns were obtained using a Bruker D8 Advance X-ray diffractometer with ( $\lambda$  (CuK $\alpha$ ) = 1.5405 Å) radiation.

### **Thermogravimetric Analyses (TGA)**

They were carried out on a TA Instruments STA499 F5 thermobalance with a 100 mL·min<sup>-1</sup> flow of nitrogen; the temperature was ramped from 20 °C to 800 °C at a rate of 5 °C·min<sup>-1</sup>.

### **Single-crystal X-ray diffraction (SCXRD)**

A suitable crystal of [Gd<sub>3</sub>L<sub>3</sub>(HCOO)]·Me<sub>2</sub>NH<sub>2</sub><sup>+</sup>·7DMF (**1**); [Tb<sub>3</sub>L<sub>3</sub>(HCOO)]·Me<sub>2</sub>NH<sub>2</sub><sup>+</sup>·7DMF (**2**); [Ho<sub>3</sub>L<sub>3</sub>(HCOO)]·Me<sub>2</sub>NH<sub>2</sub><sup>+</sup>·7DMF (**3**); [Dy<sub>3</sub>L<sub>3</sub>(HCOO)]·Me<sub>2</sub>NH<sub>2</sub><sup>+</sup>·7DMF (**4**) were mounted in a Hampton cryoloop with Paratone® N oil cryoprotectant. Intensity data collections were carried out at T = 296(2) K with a Bruker D8 VENTURE diffractometer equipped with a PHOTON

100 CMOS bidimensional detector using a high brilliance I $\mu$ S microfocus X-ray Mo Ka monochromatized radiation ( $\lambda = 0.71073 \text{ \AA}$ ). The structures were solved by intrinsic phasing methods and refined by full-matrix least squares using the SHELX-TL package.<sup>1</sup> Single crystal X-ray analysis shows that: 1-4 are heterogeneous homocrystalline structures, monoclinic crystal system,  $C2/m$  space group. In the process of structural refinement, it was found that the two positions of the benzoate (C24-C29, C31, O9 and O10) of one of the ligands L<sup>3-</sup> were statistically distributed, and the occupancy ratio was 0.5:0.5. Crystallographic data and structural refinement parameters of 1-4 are listed in Table 1-4. Further details about of the crystal structure determinations may be obtained free of charge via the Internet at <https://www.ccdc.cam.ac.uk/>. CCDC 2063236-2063239. Crystallographic data for single-crystal X-ray diffraction studies are summarized in Table S1.

## S3. Synthesis and Experimental Section

### Synthesis of [Gd<sub>3</sub>L<sub>3</sub>(HCOO)]·Me<sub>2</sub>NH<sub>2</sub><sup>+</sup>·7DMF (1)

H<sub>3</sub>L (5.0 mg, 0.014 mmol), Gd(NO<sub>3</sub>)<sub>3</sub>·6H<sub>2</sub>O (15 mg, 0.033 mmol), 1.5 mL DMF, 0.3 mL H<sub>2</sub>O, 30  $\mu$ L 68% HNO<sub>3</sub>, then the mixture was sealed in a 20 mL Teflon-lined bomb, put it in the programmed raising and cooling oven (first heat up to 160°C for 4 h, keep 160°C constant temperature for 3 days, then cool down for 3 days to 35°C). The reaction kettle was taken out, washed with DMF, and the colorless bulk single crystal 10 was synthesized. Yield: 65% (based on H<sub>3</sub>L), chemical formula: C<sub>75</sub>H<sub>82</sub>N<sub>17</sub>O<sub>27</sub>Gd<sub>3</sub>. Elemental analysis calcd for 1 (%): C, 42.38; H, 3.89; N, 11.21. Found (%): C, 42.36; H, 3.91; N, 11.23. Main infrared spectrum peak position (KBr, cm<sup>-1</sup>): 3425, 1654, 1576, 1415, 1099, 1021, 859, 788, 665, 516.

### Synthesis of [Tb<sub>3</sub>L<sub>3</sub>(HCOO)]·Me<sub>2</sub>NH<sub>2</sub><sup>+</sup>·7DMF (2)

Tb(NO<sub>3</sub>)<sub>3</sub>·6H<sub>2</sub>O was used to replace Gd(NO<sub>3</sub>)<sub>3</sub>·6H<sub>2</sub>O, and 2 was obtained by using the synthesis method of 1. Yield: 76% (based on H<sub>3</sub>L), chemical formula: C<sub>75</sub>H<sub>82</sub>N<sub>17</sub>O<sub>27</sub>Tb<sub>3</sub>. Elemental analysis calcd for 2 (%): C, 42.28; H, 3.88; N, 11.18. Found (%): C, 42.25; H, 3.80; N, 11.20. Main infrared spectrum peak position (KBr, cm<sup>-1</sup>): 3425, 1654, 1557, 1402, 1092, 1021, 859, 794, 658, 516.

## Synthesis of [Ho<sub>3</sub>L<sub>3</sub>(HCOO)]·Me<sub>2</sub>NH<sub>2</sub><sup>+</sup>·7DMF (3)

Ho(NO<sub>3</sub>)<sub>3</sub>·6H<sub>2</sub>O was used to replace Gd(NO<sub>3</sub>)<sub>3</sub>·6H<sub>2</sub>O, and 3 was obtained by using the synthesis method of 1. Yield: 58% ( based on H<sub>3</sub>L), chemical formula: C<sub>75</sub>H<sub>82</sub>N<sub>17</sub>O<sub>27</sub>Ho<sub>3</sub>. Elemental analysis calcd for 3 (%): C, 41.93; H, 3.85; N, 11.09. Found (%):C, 41.69; H, 3.91; N, 11.23. Main infrared spectrum peak position (KBr, cm<sup>-1</sup>): 3425, 1654, 1538, 1402, 1105, 1021, 859, 795, 665, 516.

## Synthesis of [Dy<sub>3</sub>L<sub>3</sub>(HCOO)]·Me<sub>2</sub>NH<sub>2</sub><sup>+</sup>·7DMF (4)

Dy(NO<sub>3</sub>)<sub>3</sub>·6H<sub>2</sub>O was used to replace Gd(NO<sub>3</sub>)<sub>3</sub>·6H<sub>2</sub>O, and 4 was obtained by using the synthesis method of 1. Yield: 76% ( based on H<sub>3</sub>L), chemical formula: : C<sub>75</sub>H<sub>82</sub>N<sub>17</sub>O<sub>27</sub>Dy<sub>3</sub>. Elemental analysis calcd for 4 (%): C, 42.07; H, 3.86; N, 11.12. Found (%): C, 41.90; H, 3.92; N, 11.23. Main infrared spectrum peak position (KBr, cm<sup>-1</sup>): 3425, 1654, 1545, 1408, 1099, 1021, 859, 795, 665, 516.

## S4. Crystal data and structure refinement

**Table S1.** Crystal data and structure refinement for compounds 1-4.

| Compound          | H <sub>3</sub> LGd                                                             | H <sub>3</sub> LTb                                                             | H <sub>3</sub> LHo                                                             | H <sub>3</sub> LDy                                                             |
|-------------------|--------------------------------------------------------------------------------|--------------------------------------------------------------------------------|--------------------------------------------------------------------------------|--------------------------------------------------------------------------------|
| Empirical formula | C <sub>52</sub> H <sub>25</sub> Gd <sub>3</sub> N <sub>9</sub> O <sub>20</sub> | C <sub>52</sub> H <sub>25</sub> Tb <sub>3</sub> N <sub>9</sub> O <sub>20</sub> | C <sub>52</sub> H <sub>25</sub> Ho <sub>3</sub> N <sub>9</sub> O <sub>20</sub> | C <sub>52</sub> H <sub>25</sub> Dy <sub>3</sub> N <sub>9</sub> O <sub>20</sub> |
| Formula weight    | 1567.56                                                                        | 1572.60                                                                        | 1590.60                                                                        | 1583.31                                                                        |
| Temperature/K     | 296(2)                                                                         | 296(2)                                                                         | 296(2)                                                                         | 296(2)                                                                         |
| Crystal system    | monoclinic                                                                     | monoclinic                                                                     | monoclinic                                                                     | monoclinic                                                                     |
| Space group       | <i>C2/m</i>                                                                    | <i>C2/m</i>                                                                    | <i>C2/m</i>                                                                    | <i>C2/m</i>                                                                    |
| a/Å               | 19.2170(13)                                                                    | 19.173(3)                                                                      | 19.0512(16)                                                                    | 19.120(5)                                                                      |
| b/Å               | 28.514(2)                                                                      | 28.476(3)                                                                      | 28.4046(16)                                                                    | 28.411(5)                                                                      |
| c/Å               | 15.3668(11)                                                                    | 15.403(2)                                                                      | 15.4074(10)                                                                    | 15.383(4)                                                                      |
| α°                | 90.00                                                                          | 90.00                                                                          | 90.00                                                                          | 90.00                                                                          |
| β°                | 100.677(4)                                                                     | 100.962(11)                                                                    | 101.195(5)                                                                     | 100.982(18)                                                                    |

|                                                 |                                                              |                                                              |                                                              |                                                              |
|-------------------------------------------------|--------------------------------------------------------------|--------------------------------------------------------------|--------------------------------------------------------------|--------------------------------------------------------------|
| $\gamma/^\circ$                                 | 90.00                                                        | 90.00                                                        | 90.00                                                        | 90.00                                                        |
| Volume/ $\text{\AA}^3$                          | 8274.6(10)                                                   | 8255.7(19)                                                   | 8178.9(10)                                                   | 8203(3)                                                      |
| Z                                               | 4                                                            | 4                                                            | 4                                                            | 4                                                            |
| $\rho_{\text{calc}}/\text{cm}^3$                | 1.258                                                        | 1.265                                                        | 1.292                                                        | 1.282                                                        |
| $\mu/\text{mm}^{-1}$                            | 2.467                                                        | 2.632                                                        | 2.965                                                        | 2.795                                                        |
| F(000)                                          | 4236.0                                                       | 4248.0                                                       | 4272.0                                                       | 4260.0                                                       |
| Crystal size/ $\text{mm}^3$                     | $0.21 \times 0.14 \times 0.10$                               | $0.23 \times 0.12 \times 0.11$                               | $0.20 \times 0.13 \times 0.12$                               | $0.22 \times 0.12 \times 0.10$                               |
| Radiation                                       | MoK $\alpha$ ( $\lambda = 0.71073$ )                         |
| 2 $\Theta$ range for data collection / $^\circ$ | 2.7 to 55.38                                                 | 2.6 to 49.98                                                 | 2.6 to 55.4                                                  | 2.6 to 50                                                    |
| Index ranges                                    | $-25 \leq h \leq 25, -37 \leq k \leq 37, -20 \leq l \leq 20$ | $-22 \leq h \leq 22, -33 \leq k \leq 33, -18 \leq l \leq 18$ | $-24 \leq h \leq 24, -36 \leq k \leq 36, -20 \leq l \leq 20$ | $-22 \leq h \leq 22, -33 \leq k \leq 33, -18 \leq l \leq 18$ |
| Reflections collected                           | 110232                                                       | 121194                                                       | 133145                                                       | 110073                                                       |
| Independent reflections                         | 9793 [Rint = 0.0905, Rsigma = N/A]                           | 7432 [Rint = 0.2065, Rsigma = N/A]                           | 9693 [Rint = 0.1420, Rsigma = N/A]                           | 7396 [Rint = 0.1524, Rsigma = N/A]                           |
| Data/restraints/parameters                      | 9793/41/360                                                  | 7432/120/348                                                 | 9693/78/360                                                  | 7396/125/360                                                 |
| Goodness-of-fit on $F^2$                        | 1.046                                                        | 1.047                                                        | 1.039                                                        | 1.283                                                        |
| Final R indexes [I $\geq 2\sigma(I)$ ]          | R1 = 0.0533, wR2 = 0.1359                                    | R1 = 0.0966, wR2 = 0.2632                                    | R1 = 0.0823, wR2 = 0.2078                                    | R1 = 0.0986, wR2 = 0.2263                                    |
| Final R indexes [all data]                      | R1 = 0.0736, wR2 = 0.1441                                    | R1 = 0.1208, wR2 = 0.2860                                    | R1 = 0.1099, wR2 = 0.2267                                    | R1 = 0.1184, wR2 = 0.2392                                    |
| Largest diff. peak/hole / $e \text{\AA}^{-3}$   | 3.41/-2.58                                                   | 3.77/-3.37                                                   | 2.64/-3.78                                                   | 4.10/-1.58                                                   |

## S5 Powder X-ray diffraction (PXRD)

As shown in Figure S1, from the theoretical simulation and experimental PXRD spectra of 1-4, it can be seen that the main peak positions of the four MOFs are the same, and the individual small peaks are different, mainly due to the influence of the solvent molecules in the MOFs. It shows that the experimentally synthesized crystal is a pure phase substance and can be used for the determination of other properties

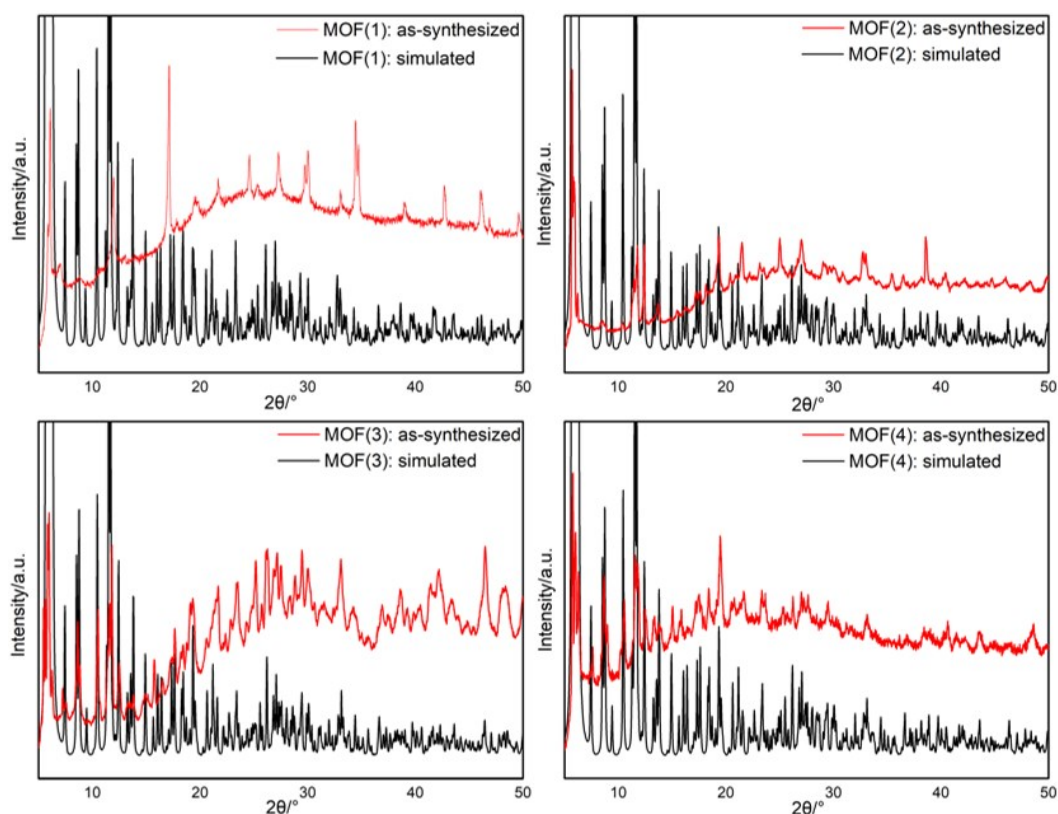

**Figure S1** Experimental and simulated PXRD patterns.

## S6 Thermogravimetric analyses (TGA)

As shown in Figure S2, from the thermogravimetric curve of 1-4, it can be seen that their TG curves are very similar, which indicates that they have similar thermal stability. Take 1 as an example for analysis. The thermogravimetric curve of 1 shows that the first significant weight loss occurred in the temperature range of 30-301°C, with a total loss of 25.3%. In this interval, seven DMF molecules and one counterion were lost (theoretical value 25.7%). As the temperature slowly increased, the ligand L<sup>3-</sup> began to decompose, and the 1-4 skeleton opened and slowly collapsed.

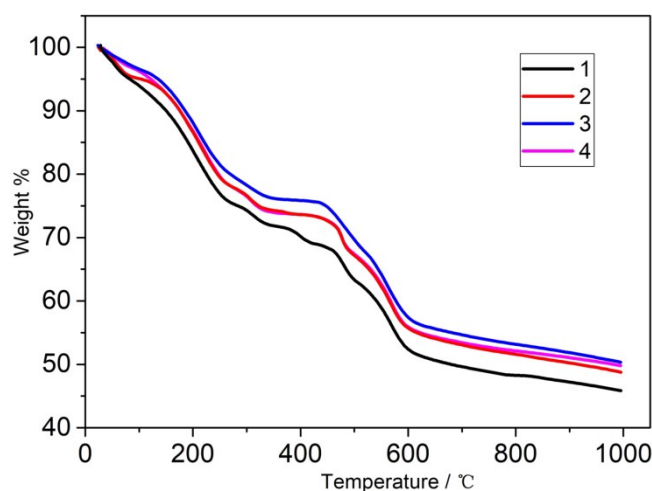

**Figure S2** Thermogravimetric curve of 1-4

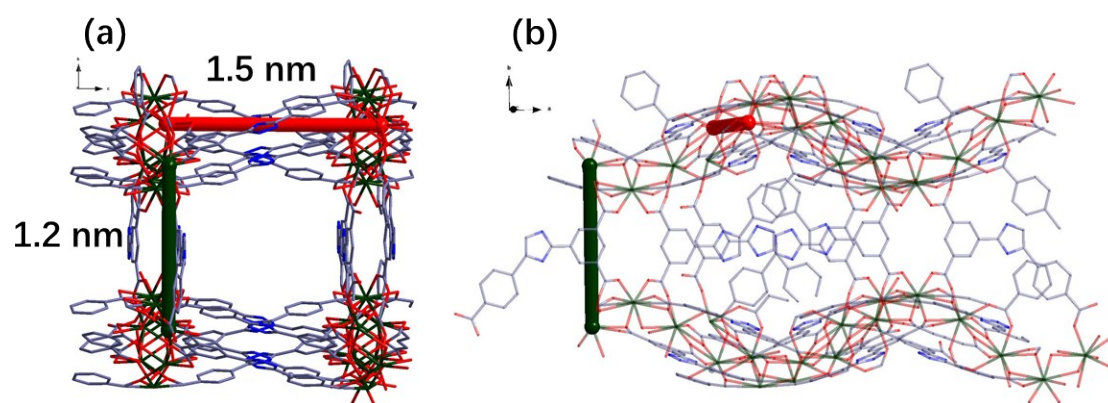

**Figure S3** The estimated aperture of one-dimensional tunnels viewed by two directions.

## S7 Reference

1 Sheldrick, G. M. *Acta Cryst. A* **2008**, 64, 112.

## S8 Tables for bond lengths

**Table 1. Bond lengths (Å) for compound 1**

| Atom | Atom | Length/Å | Atom | Atom  | Length/Å  |
|------|------|----------|------|-------|-----------|
| Gd1  | O8   | 2.281(4) | N5   | N511  | 1.240(14) |
| Gd1  | O81  | 2.281(4) | N5   | C2311 | 1.240(14) |
| Gd1  | O32  | 2.363(3) | N5   | C24   | 1.748(8)  |
| Gd1  | O33  | 2.363(3) | C1   | C6    | 1.380(8)  |
| Gd1  | O64  | 2.425(4) | C1   | C2    | 1.402(6)  |
| Gd1  | O65  | 2.425(4) | C1   | C15   | 1.498(6)  |
| Gd1  | O55  | 2.560(3) | C2   | C3    | 1.392(7)  |
| Gd1  | O54  | 2.560(3) | C3   | C4    | 1.396(8)  |



|     |      |           |     |       |           |
|-----|------|-----------|-----|-------|-----------|
| Gd1 | C175 | 2.860(5)  | C3  | C16   | 1.493(7)  |
| Gd1 | C174 | 2.860(5)  | C4  | C5    | 1.391(7)  |
| Gd1 | Gd2  | 4.0088(4) | C5  | C6    | 1.385(8)  |
| Gd1 | Gd21 | 4.0088(4) | C5  | C7    | 1.478(9)  |
| Gd2 | O11  | 2.278(6)  | C8  | C9    | 1.474(9)  |
| Gd2 | O122 | 2.355(5)  | C9  | C14   | 1.386(9)  |
| Gd2 | O106 | 2.362(10) | C9  | C10   | 1.403(9)  |
| Gd2 | O7   | 2.370(4)  | C10 | C11   | 1.367(8)  |
| Gd2 | O22  | 2.383(4)  | C11 | C12   | 1.392(8)  |
| Gd2 | O1   | 2.444(4)  | C12 | C13   | 1.371(8)  |
| Gd2 | O55  | 2.478(4)  | C12 | C17   | 1.511(7)  |
| Gd2 | O33  | 2.534(3)  | C13 | C14   | 1.376(8)  |
| Gd2 | O97  | 2.550(9)  | C16 | Gd28  | 2.892(5)  |
| Gd2 | O43  | 2.557(4)  | C17 | Gd19  | 2.860(5)  |
| Gd2 | O2   | 2.610(3)  | C18 | C19   | 1.385(6)  |
| Gd2 | C163 | 2.892(5)  | C18 | C1911 | 1.385(6)  |
| O1  | C15  | 1.263(6)  | C19 | C20   | 1.391(7)  |
| O2  | C15  | 1.266(6)  | C19 | C30   | 1.525(6)  |
| O2  | Gd22 | 2.383(4)  | C20 | C21   | 1.386(7)  |
| O3  | C16  | 1.293(7)  | C21 | C2011 | 1.386(7)  |
| O3  | Gd12 | 2.363(3)  | C21 | C22   | 1.495(13) |
| O3  | Gd28 | 2.534(3)  | C22 | N411  | 1.315(9)  |
| O4  | C16  | 1.226(6)  | C24 | C25   | 1.4016    |
| O4  | Gd28 | 2.557(4)  | C24 | C29   | 1.4018    |
| O5  | C17  | 1.256(7)  | C25 | C26   | 1.4008    |
| O5  | Gd29 | 2.478(4)  | C26 | C27   | 1.4016    |

|     |       |           |     |       |           |
|-----|-------|-----------|-----|-------|-----------|
| O5  | Gd19  | 2.560(3)  | C27 | C28   | 1.402     |
| O6  | C17   | 1.275(7)  | C27 | C31   | 1.411     |
| O6  | Gd19  | 2.425(4)  | C27 | C3210 | 1.5366    |
| O7  | C30   | 1.247(6)  | C28 | C29   | 1.4014    |
| O8  | C30   | 1.263(6)  | C31 | C3210 | 0.3224    |
| O9  | O1110 | 0.330(9)  | C31 | O1210 | 1.0988    |
| O9  | C3210 | 0.956(9)  | C31 | O1110 | 1.5682    |
| O9  | C31   | 1.251(9)  | O11 | O97   | 0.330(12) |
| O9  | Gd210 | 2.550(9)  | O11 | C32   | 1.264     |
| O10 | O1210 | 0.254(11) | O11 | C317  | 1.5682    |
| O10 | C31   | 1.235(9)  | C32 | C317  | 0.3224    |
| O10 | C3210 | 1.438(9)  | C32 | O97   | 0.956(15) |
| O10 | Gd26  | 2.362(10) | C32 | O12   | 1.271     |
| N1  | C8    | 1.314(9)  | C32 | O107  | 1.438(15) |
| N1  | C7    | 1.337(8)  | C32 | C277  | 1.5366    |
| N2  | C7    | 1.323(9)  | O12 | O107  | 0.254(18) |
| N2  | N3    | 1.365(8)  | O12 | C317  | 1.0988    |
| N3  | C8    | 1.307(9)  | O12 | Gd22  | 2.355(8)  |
| N4  | C22   | 1.315(9)  |     |       |           |

**Table 2. Bond lengths (Å) for compound 2**

| Atom | Atom | Length/Å | Atom | Atom  | Length/Å  |
|------|------|----------|------|-------|-----------|
| Tb1  | O8   | 2.275(9) | N5   | N511  | 1.313(19) |
| Tb1  | O81  | 2.275(9) | N5   | C2311 | 1.313(19) |
| Tb1  | O32  | 2.354(9) | N5   | C24   | 1.733(18) |
| Tb1  | O33  | 2.354(9) | C1   | C2    | 1.387(17) |

|     |      |           |     |       |           |
|-----|------|-----------|-----|-------|-----------|
| Tb1 | O64  | 2.414(10) | C1  | C6    | 1.396(19) |
| Tb1 | O65  | 2.414(10) | C1  | C15   | 1.482(16) |
| Tb1 | O54  | 2.565(9)  | C2  | C3    | 1.374(17) |
| Tb1 | O55  | 2.565(9)  | C3  | C4    | 1.395(19) |
| Tb1 | C174 | 2.869(13) | C3  | C16   | 1.491(18) |
| Tb1 | C175 | 2.869(13) | C4  | C5    | 1.37(2)   |
| Tb1 | Tb21 | 4.0016(8) | C5  | C6    | 1.36(2)   |
| Tb1 | Tb2  | 4.0016(8) | C5  | C7    | 1.48(2)   |
| Tb2 | O122 | 2.317(11) | C8  | C9    | 1.50(2)   |
| Tb2 | O11  | 2.320(15) | C9  | C10   | 1.39(2)   |
| Tb2 | O106 | 2.33(2)   | C9  | C14   | 1.38(2)   |
| Tb2 | O7   | 2.335(9)  | C10 | C11   | 1.41(2)   |
| Tb2 | O22  | 2.346(9)  | C11 | C12   | 1.38(2)   |
| Tb2 | O1   | 2.428(9)  | C12 | C13   | 1.412(19) |
| Tb2 | O55  | 2.496(9)  | C12 | C17   | 1.473(19) |
| Tb2 | O33  | 2.519(9)  | C13 | C14   | 1.38(2)   |
| Tb2 | O97  | 2.53(2)   | C16 | Tb28  | 2.904(13) |
| Tb2 | O43  | 2.561(10) | C17 | Tb19  | 2.869(13) |
| Tb2 | O2   | 2.609(8)  | C18 | C19   | 1.389(16) |
| Tb2 | C163 | 2.904(13) | C18 | C1911 | 1.389(16) |
| O1  | C15  | 1.278(16) | C19 | C20   | 1.362(17) |
| O2  | C15  | 1.295(15) | C19 | C30   | 1.552(16) |
| O2  | Tb22 | 2.346(9)  | C20 | C21   | 1.402(16) |
| O3  | C16  | 1.292(15) | C21 | C2011 | 1.402(16) |
| O3  | Tb12 | 2.354(9)  | C21 | C22   | 1.46(4)   |
| O3  | Tb28 | 2.519(9)  | C22 | N411  | 1.34(2)   |

|     |       |           |     |       |            |
|-----|-------|-----------|-----|-------|------------|
| O4  | C16   | 1.253(16) | C24 | C29   | 1.402(2)   |
| O4  | Tb28  | 2.561(10) | C24 | C25   | 1.404(2)   |
| O5  | C17   | 1.250(14) | C25 | C26   | 1.402(2)   |
| O5  | Tb29  | 2.496(9)  | C26 | C27   | 1.402(2)   |
| O5  | Tb19  | 2.565(9)  | C27 | C28   | 1.405(2)   |
| O6  | C17   | 1.260(15) | C27 | C31   | 1.412(2)   |
| O6  | Tb19  | 2.414(10) | C27 | C3210 | 1.504(2)   |
| O7  | C30   | 1.247(14) | C28 | C29   | 1.403(2)   |
| O8  | C30   | 1.245(14) | C31 | C3210 | 0.2595     |
| O9  | O1110 | 0.270(19) | C31 | O1210 | 1.1470(18) |
| O9  | C3210 | 1.051(16) | C31 | O1110 | 1.479(2)   |
| O9  | C31   | 1.244(15) | O11 | O97   | 0.27(3)    |
| O9  | Tb210 | 2.53(2)   | O11 | C32   | 1.2665(19) |
| O10 | O1210 | 0.16(2)   | O11 | C317  | 1.479(2)   |
| O10 | C31   | 1.231(16) | C32 | C317  | 0.2595     |
| O10 | C3210 | 1.366(16) | C32 | O97   | 1.05(3)    |
| O10 | Tb26  | 2.33(2)   | C32 | O12   | 1.2705(19) |
| N1  | C8    | 1.32(2)   | C32 | O107  | 1.37(3)    |
| N1  | C7    | 1.33(2)   | C32 | C277  | 1.504(2)   |
| N2  | C7    | 1.33(2)   | O12 | O107  | 0.16(4)    |
| N2  | N3    | 1.348(19) | O12 | C317  | 1.1470(17) |
| N3  | C8    | 1.32(2)   | O12 | Tb22  | 2.317(19)  |
| N4  | C22   | 1.34(2)   |     |       |            |

**Table 3. Bond lengths (Å) for compound 3**

| Atom | Atom | Length/Å | Atom | Atom  | Length/Å  |
|------|------|----------|------|-------|-----------|
| Ho1  | O81  | 2.247(7) | N5   | C2311 | 1.288(18) |

|     |      |           |     |       |           |
|-----|------|-----------|-----|-------|-----------|
| Ho1 | O8   | 2.247(7)  | N5  | N511  | 1.288(18) |
| Ho1 | O32  | 2.333(6)  | N5  | C24   | 1.711(14) |
| Ho1 | O33  | 2.333(6)  | C1  | C2    | 1.385(12) |
| Ho1 | O64  | 2.396(7)  | C1  | C6    | 1.393(12) |
| Ho1 | O65  | 2.396(7)  | C1  | C15   | 1.495(12) |
| Ho1 | O54  | 2.541(6)  | C2  | C3    | 1.390(12) |
| Ho1 | O55  | 2.541(6)  | C3  | C4    | 1.405(13) |
| Ho1 | C174 | 2.843(10) | C3  | C16   | 1.470(13) |
| Ho1 | C175 | 2.843(10) | C4  | C5    | 1.399(14) |
| Ho1 | Ho2  | 3.9660(5) | C5  | C6    | 1.380(13) |
| Ho1 | Ho21 | 3.9660(5) | C5  | C7    | 1.438(14) |
| Ho2 | O106 | 2.272(18) | C8  | C9    | 1.476(16) |
| Ho2 | O7   | 2.322(6)  | C9  | C10   | 1.353(15) |
| Ho2 | O123 | 2.334(8)  | C9  | C14   | 1.392(16) |
| Ho2 | O11  | 2.349(11) | C10 | C11   | 1.413(14) |
| Ho2 | O23  | 2.350(6)  | C11 | C12   | 1.413(15) |
| Ho2 | O1   | 2.402(6)  | C12 | C13   | 1.385(14) |
| Ho2 | O54  | 2.457(6)  | C12 | C17   | 1.474(13) |
| Ho2 | O32  | 2.491(6)  | C13 | C14   | 1.381(15) |
| Ho2 | O97  | 2.502(16) | C16 | Ho28  | 2.861(10) |
| Ho2 | O42  | 2.540(7)  | C17 | Ho19  | 2.843(10) |
| Ho2 | O2   | 2.583(6)  | C18 | C1911 | 1.394(11) |
| Ho2 | C162 | 2.861(10) | C18 | C19   | 1.394(11) |
| O1  | C15  | 1.270(11) | C19 | C20   | 1.367(13) |
| O2  | C15  | 1.264(11) | C19 | C30   | 1.525(11) |
| O2  | Ho23 | 2.350(6)  | C20 | C21   | 1.400(12) |

|     |       |           |     |       |            |
|-----|-------|-----------|-----|-------|------------|
| O3  | C16   | 1.299(11) | C21 | C2011 | 1.400(12)  |
| O3  | Ho13  | 2.333(6)  | C21 | C22   | 1.46(3)    |
| O3  | Ho28  | 2.491(6)  | C22 | N411  | 1.334(18)  |
| O4  | C16   | 1.232(12) | C24 | C29   | 1.3941(16) |
| O4  | Ho28  | 2.540(7)  | C24 | C25   | 1.4022(16) |
| O5  | C17   | 1.252(10) | C25 | C26   | 1.3972(16) |
| O5  | Ho29  | 2.457(6)  | C26 | C27   | 1.3941(16) |
| O5  | Ho19  | 2.541(6)  | C27 | C28   | 1.4025(16) |
| O6  | C17   | 1.266(12) | C27 | C31   | 1.4062(16) |
| O6  | Ho19  | 2.396(7)  | C27 | C3210 | 1.4709(16) |
| O7  | C30   | 1.225(10) | C28 | C29   | 1.3979(16) |
| O8  | C30   | 1.275(10) | C31 | C3210 | 0.2938     |
| O9  | O1110 | 0.276(15) | C31 | O1210 | 1.0868(12) |
| O9  | C3210 | 1.048(13) | C31 | O1110 | 1.5038(17) |
| O9  | C31   | 1.265(13) | O11 | O97   | 0.28(2)    |
| O9  | Ho210 | 2.502(16) | O11 | C32   | 1.2644(14) |
| O10 | O1210 | 0.161(16) | O11 | C317  | 1.5038(17) |
| O10 | C31   | 1.224(13) | C32 | C317  | 0.2938     |
| O10 | C3210 | 1.404(13) | C32 | O97   | 1.05(2)    |
| O10 | Ho26  | 2.272(18) | C32 | O12   | 1.2637(14) |
| N1  | C8    | 1.326(15) | C32 | O107  | 1.40(2)    |
| N1  | C7    | 1.326(16) | C32 | C277  | 1.4709(17) |
| N2  | C7    | 1.352(15) | O12 | O107  | 0.16(3)    |
| N2  | N3    | 1.351(14) | O12 | C317  | 1.0868(12) |
| N3  | C8    | 1.314(18) | O12 | Ho23  | 2.334(14)  |
| N4  | C22   | 1.334(18) |     |       |            |

**Table 4. Bond lengths (Å) for compound 4**

| Atom | Atom | Length/Å   | Atom | Atom  | Length/Å  |
|------|------|------------|------|-------|-----------|
| Dy1  | O8   | 2.251(8)   | N5   | C2311 | 1.300(18) |
| Dy1  | O81  | 2.251(8)   | N5   | N511  | 1.300(18) |
| Dy1  | O32  | 2.342(8)   | N5   | C24   | 1.705(15) |
| Dy1  | O33  | 2.342(8)   | C1   | C2    | 1.402(15) |
| Dy1  | O64  | 2.393(8)   | C1   | C6    | 1.370(17) |
| Dy1  | O65  | 2.393(9)   | C1   | C15   | 1.462(16) |
| Dy1  | O54  | 2.552(8)   | C2   | C3    | 1.369(16) |
| Dy1  | O55  | 2.552(8)   | C3   | C4    | 1.402(18) |
| Dy1  | C174 | 2.874(10)  | C3   | C16   | 1.487(16) |
| Dy1  | C175 | 2.874(10)  | C4   | C5    | 1.394(17) |
| Dy1  | Dy2  | 3.9800(10) | C5   | C6    | 1.375(18) |
| Dy1  | Dy21 | 3.9800(10) | C5   | C7    | 1.45(2)   |
| Dy2  | O122 | 2.317(10)  | C8   | C9    | 1.46(2)   |
| Dy2  | O106 | 2.30(2)    | C9   | C14   | 1.398(19) |
| Dy2  | O11  | 2.325(14)  | C9   | C10   | 1.37(2)   |
| Dy2  | O7   | 2.328(8)   | C10  | C11   | 1.382(18) |
| Dy2  | O22  | 2.340(8)   | C11  | C12   | 1.401(17) |
| Dy2  | O1   | 2.395(9)   | C12  | C13   | 1.398(18) |
| Dy2  | O54  | 2.466(8)   | C12  | C17   | 1.465(17) |
| Dy2  | O33  | 2.505(7)   | C13  | C14   | 1.357(18) |
| Dy2  | O97  | 2.514(18)  | C16  | Dy28  | 2.889(12) |
| Dy2  | O43  | 2.547(10)  | C17  | Dy19  | 2.874(10) |
| Dy2  | O2   | 2.597(7)   | C18  | C1911 | 1.385(14) |
| Dy2  | C163 | 2.889(12)  | C18  | C19   | 1.385(14) |

|     |       |           |     |       |            |
|-----|-------|-----------|-----|-------|------------|
| O1  | C15   | 1.292(14) | C19 | C20   | 1.396(15)  |
| O2  | C15   | 1.273(14) | C19 | C30   | 1.530(14)  |
| O2  | Dy22  | 2.340(8)  | C20 | C21   | 1.377(14)  |
| O3  | C16   | 1.307(14) | C21 | C2011 | 1.377(14)  |
| O3  | Dy12  | 2.342(8)  | C21 | C22   | 1.49(3)    |
| O3  | Dy28  | 2.505(7)  | C22 | N411  | 1.342(18)  |
| O4  | C16   | 1.232(15) | C24 | C29   | 1.3966(19) |
| O4  | Dy28  | 2.547(10) | C24 | C25   | 1.3999(19) |
| O5  | C17   | 1.259(13) | C25 | C26   | 1.3976(19) |
| O5  | Dy29  | 2.466(8)  | C26 | C27   | 1.3966(19) |
| O5  | Dy19  | 2.552(7)  | C27 | C28   | 1.4003(19) |
| O6  | C17   | 1.273(14) | C27 | C31   | 1.4072(19) |
| O6  | Dy19  | 2.393(8)  | C27 | C3210 | 1.513(2)   |
| O7  | C30   | 1.222(12) | C28 | C29   | 1.3980(19) |
| O8  | C30   | 1.278(13) | C31 | C3210 | 0.2912     |
| O9  | O1110 | 0.274(17) | C31 | O1210 | 1.1301(16) |
| O9  | C3210 | 1.038(15) | C31 | O1110 | 1.501(2)   |
| O9  | C31   | 1.257(15) | O11 | O97   | 0.27(3)    |
| O9  | Dy210 | 2.514(18) | O11 | C32   | 1.2626(17) |
| O10 | O1210 | 0.14(2)   | O11 | C317  | 1.501(2)   |
| O10 | C31   | 1.228(15) | C32 | C317  | 0.2912     |
| O10 | C3210 | 1.374(15) | C32 | O97   | 1.04(3)    |
| O10 | Dy26  | 2.30(2)   | C32 | O12   | 1.2660(17) |
| N1  | C8    | 1.32(2)   | C32 | O107  | 1.37(3)    |
| N1  | C7    | 1.337(19) | C32 | C277  | 1.513(2)   |
| N2  | C7    | 1.34(2)   | O12 | O107  | 0.14(4)    |



|    |     |           |     |      |            |
|----|-----|-----------|-----|------|------------|
| N2 | N3  | 1.363(19) | O12 | C317 | 1.1301(15) |
| N3 | C8  | 1.30(2)   | O12 | Dy22 | 2.317(17)  |
| N4 | C22 | 1.342(18) |     |      |            |
